# Supplementary material for: Impact of Manganese and Chromate on Specific DNA Double-Strand Break Repair Pathways
Source: MDPI journal article supplement (doi:10.3390/ijms241210392), 2023-06-20
Supplement: s1 [file s1]

## Impact of manganese and chromate on specific DNA double strand break repair pathways

Vivien M. M. Haberland <sup>1</sup>, Simon Magin <sup>2</sup>, George Iliakis <sup>2</sup> and Andrea Hartwig <sup>1, \*</sup>

<sup>1</sup> Department of Food Chemistry and Toxicology, Institute for Applied Biosciences, Karlsruhe Institute of Technology (KIT), Karlsruhe, Germany; andrea.hartwig@kit.edu; vivien.haberland@googlemail.com

<sup>2</sup> Institute of Medical Radiation Biology, University of Duisburg-Essen, Medical School, Essen, Germany; georg.iliakis@uk-essen.de; simon.magin@uk-essen.de

\* Correspondence: andrea.hartwig@kit.edu; Tel.: +49-721-608-47645

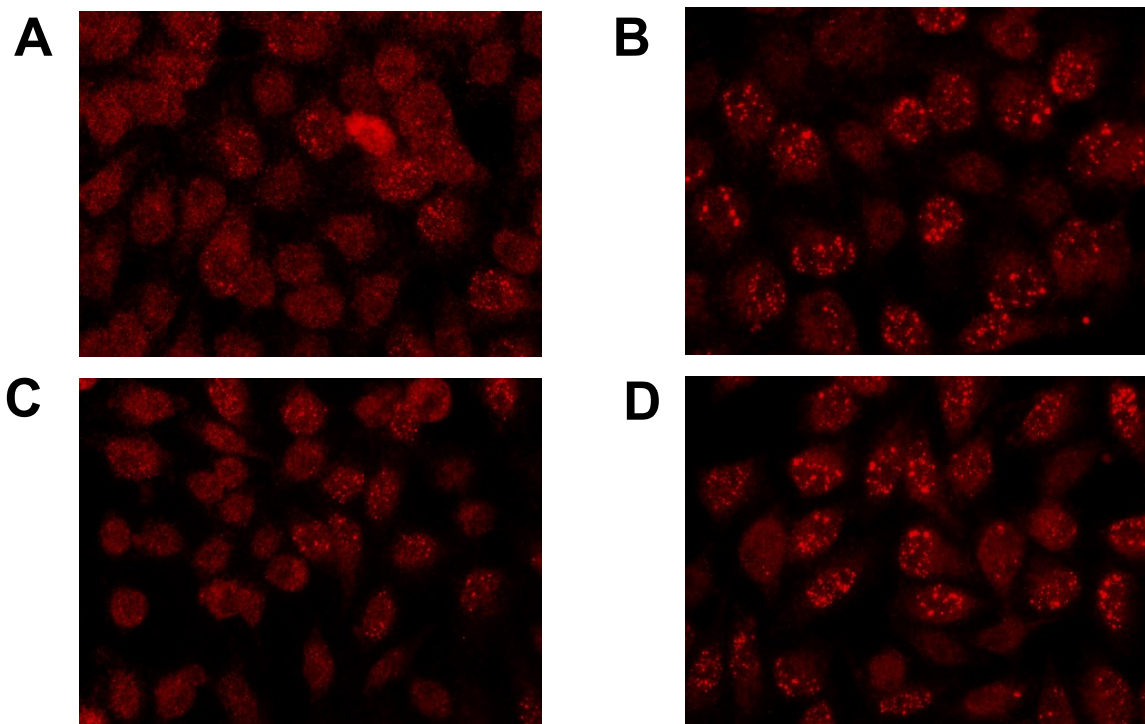

**Figure S1.** Impact on Rad51 foci formation by manganese and irradiation in HeLa S3 cells. A: Control; B: Irradiation with 1 Gy; C: 64 + 8 h manganese treatment (250 µM); D: 64 h pre-incubation with 250 µM manganese, 1 Gy irradiation and 8 h post-incubation with manganese.

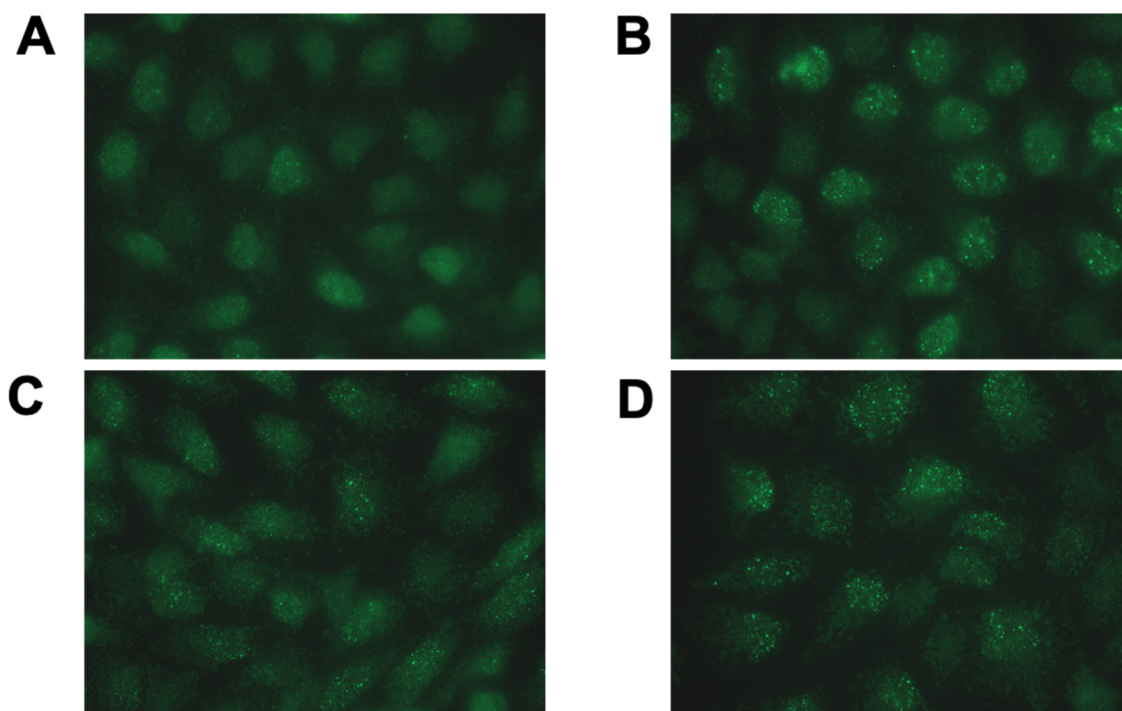

**Figure S2.** Impact on Rad54 foci formation by manganese and irradiation in HeLa S3 cells. A: Control; B: Irradiation with 1 Gy; C: 64 + 8 h manganese treatment (250  $\mu$ M); D: 64 h pre-incubation with 250  $\mu$ M manganese, 1 Gy irradiation and 8 h post-incubation with manganese.

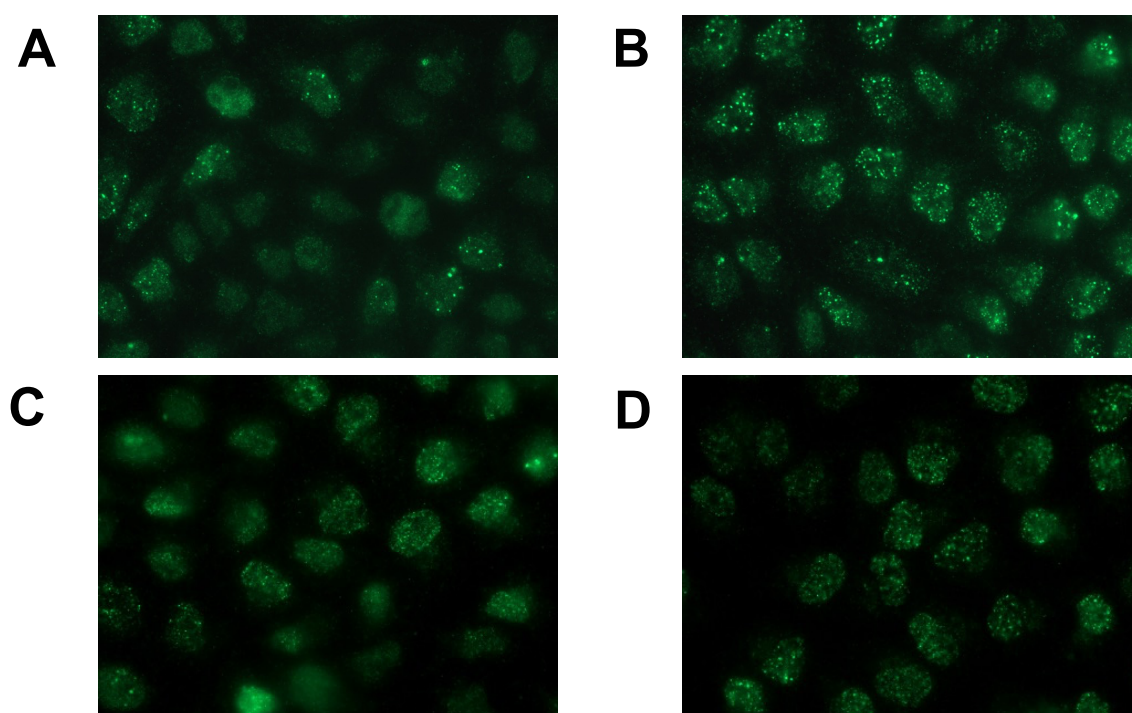

**Figure S3.** Impact on BRCA1 foci formation by Cr(VI) and irradiation in HeLa S3 cells. A: Control; B: Irradiation with 1 Gy; C: 64 + 8 h Cr(VI) treatment (2.5  $\mu$ M); D: 64 h pre-incubation with 2.5  $\mu$ M K<sub>2</sub>Cr<sub>2</sub>O<sub>7</sub>, 1 Gy irradiation and 8 h post-incubation with K<sub>2</sub>Cr<sub>2</sub>O<sub>7</sub>.

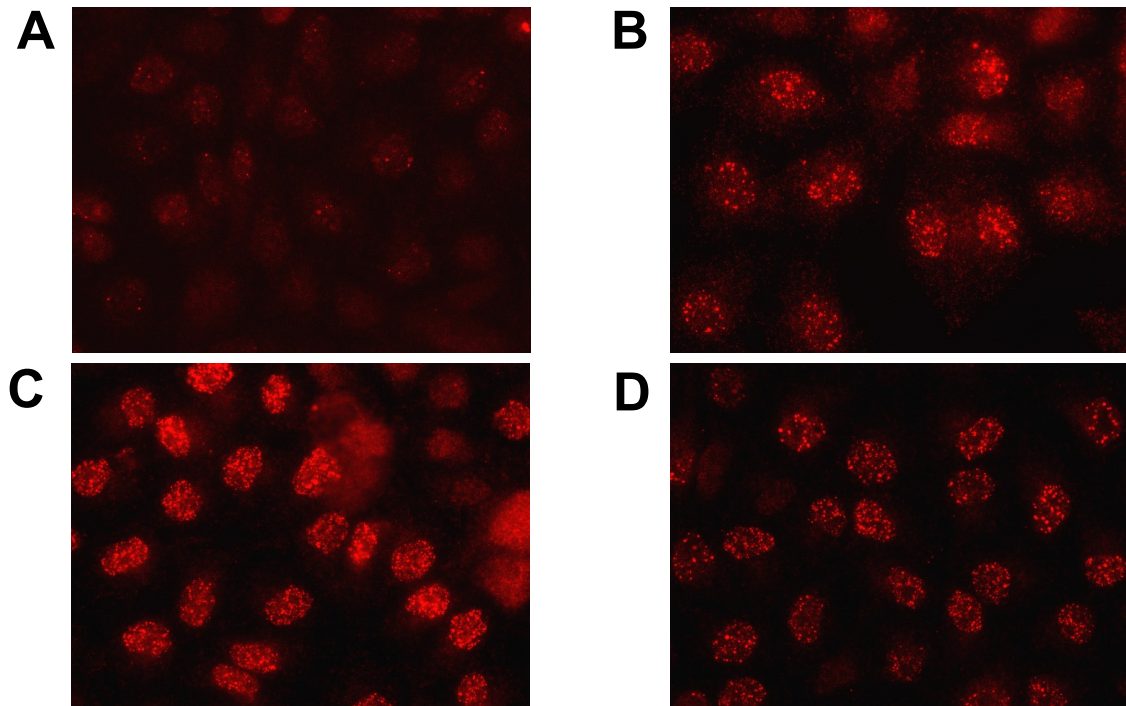

**Figure S4.** Impact on RAD51 foci formation by Cr(VI) and irradiation in HeLa S3 cells. A: Control; B: Irradiation with 1 Gy; C: 64 + 8 h Cr(VI) treatment (2.5  $\mu$ M); D: 64 h pre-incubation with 2.5  $\mu$ M  $K_2Cr_2O_7$ , 1 Gy irradiation and 8 h post-incubation with  $K_2Cr_2O_7$ .

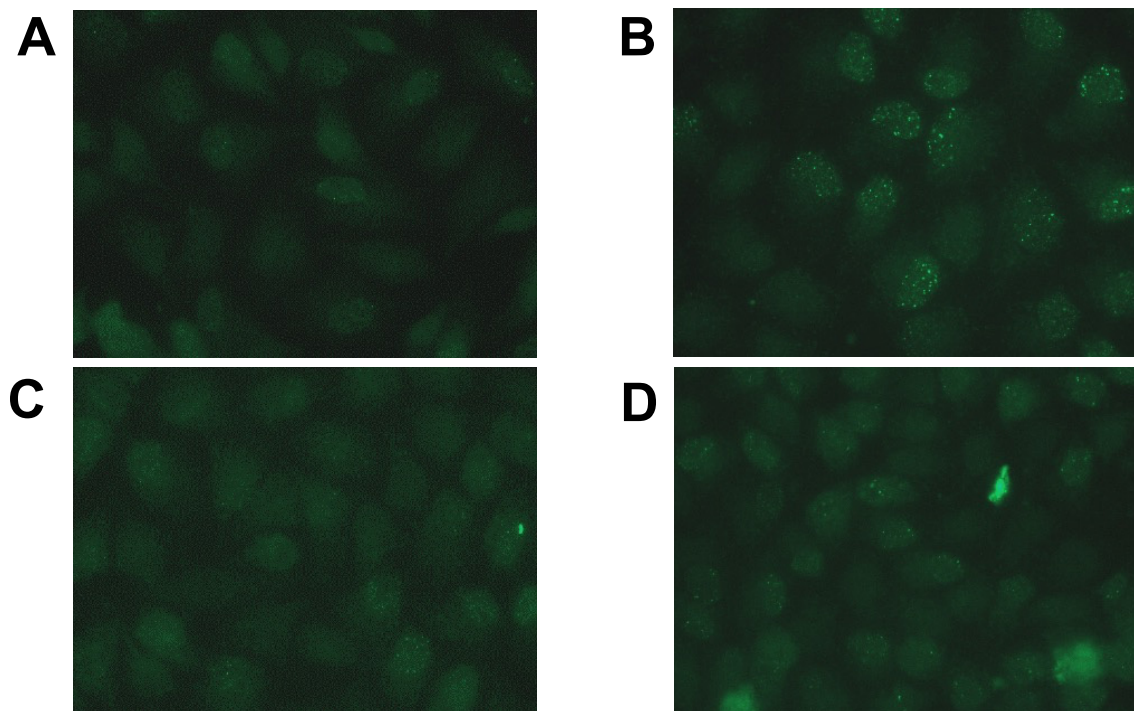

**Figure S5.** Impact on RAD54 foci formation by Cr(VI) and irradiation in HeLa S3 cells. A: Control; B: Irradiation with 1 Gy; C: 64 + 8 h Cr(VI) treatment (2.5  $\mu$ M); D: 64 h pre-incubation with 2.5  $\mu$ M  $K_2Cr_2O_7$ , 1 Gy irradiation and 8 h post-incubation with  $K_2Cr_2O_7$ .
